# Supplementary material
Source: PubMed Central journal article supplement (PMC3691779)
Supplement: supp_WNL.0b013e3182897082_Table_e-3.pdf [file supp_WNL.0b013e3182897082_Table_e-3.pdf]

| <b>Table e-3: Associations of time to surgery, time to referral and time from referral to surgery with clinical, diagnostic (MRI normal vs. abnormal), and demographic variables *</b> |                           |                   |                           |                   |                                      |                |
|----------------------------------------------------------------------------------------------------------------------------------------------------------------------------------------|---------------------------|-------------------|---------------------------|-------------------|--------------------------------------|----------------|
|                                                                                                                                                                                        | <b>Time to surgery</b>    |                   | <b>Time to referral</b>   |                   | <b>Time from referral to surgery</b> |                |
|                                                                                                                                                                                        | <b>HR (95% CI)</b>        | <b>p-value</b>    | <b>HR (95% CI)</b>        | <b>p-value</b>    | <b>HR (95% CI)</b>                   | <b>p-value</b> |
| <b>Clinical Variables</b>                                                                                                                                                              |                           |                   |                           |                   |                                      |                |
| Infantile Spasms ( <i>Ref: No spasms</i> )                                                                                                                                             |                           |                   |                           |                   |                                      |                |
| Active Spasms                                                                                                                                                                          | <b>5.80 (3.82 – 8.81)</b> | <b>&lt;0.001</b>  | <b>5.50 (3.60 – 8.39)</b> | <b>&lt;0.001</b>  | <b>1.77 (1.19 – 2.64)</b>            | <b>0.005</b>   |
| Successfully treated spasms                                                                                                                                                            | <b>2.20 (1.64 – 2.96)</b> | <b>&lt;0.001</b>  | <b>2.25 (1.67 – 3.04)</b> | <b>&lt;0.001</b>  | 1.16 (0.86 – 1.56)                   | 0.34           |
| Daily or Greater Seizures ( <i>Ref: &lt; daily</i> )                                                                                                                                   | <b>2.10 (1.59 – 2.77)</b> | <b>&lt;0.001</b>  | <b>2.14 (1.61 – 2.84)</b> | <b>&lt;0.001</b>  | 1.11 (0.83 – 1.47)                   | 0.48           |
| Etiology ND ( <i>Ref: non-ND</i> )                                                                                                                                                     | 1.27 (0.99 – 1.63)        | 0.06              | 1.24 (0.97 – 1.59)        | 0.11              | 1.19 (0.91 – 1.57)                   | 0.20           |
| Number of AEDs ( <i>Ref: 0 – 1</i> )                                                                                                                                                   |                           |                   |                           |                   |                                      |                |
| 2 AEDs                                                                                                                                                                                 | 0.79 (0.58 – 1.08)        | 0.15              | <b>0.66 (0.48 – 0.90)</b> | <b>0.009</b>      | 1.11 (0.81 – 1.52)                   | 0.53           |
| ≥ 3 AEDs                                                                                                                                                                               | 0.98 (0.71 – 1.33)        | 0.88              | 0.88 (0.64 – 1.21)        | 0.44              | 1.11 (0.81 – 1.52)                   | 0.52           |
| Age of epilepsy onset                                                                                                                                                                  | <b>1.09 (1.05 – 1.14)</b> | <b>&lt;0.001</b>  | <b>1.09 (1.05 – 1.14)</b> | <b>&lt;0.001</b>  | 0.99 (0.95 – 1.04)                   | 0.75           |
| <b>Diagnostic Variables</b>                                                                                                                                                            |                           |                   |                           |                   |                                      |                |
| MRI Prior to Referral ( <i>Ref: No/Unknown</i> )                                                                                                                                       |                           |                   |                           |                   |                                      |                |
| MRI completed - normal                                                                                                                                                                 | <b>1.67 (1.16 – 2.40)</b> | <b>0.006</b>      | <b>1.64 (1.13 – 2.38)</b> | <b>0.01</b>       | 1.17 (0.81 – 1.68)                   | 0.41           |
| MRI completed - abnormal                                                                                                                                                               | <b>2.03 (1.52 – 2.71)</b> | <b>&lt;0.0001</b> | <b>1.82 (1.36 – 2.44)</b> | <b>&lt;0.0001</b> | <b>1.51 (1.12 – 2.03)</b>            | <b>0.007</b>   |
| <b>Demographic Variables</b>                                                                                                                                                           |                           |                   |                           |                   |                                      |                |
| Male                                                                                                                                                                                   | 1.20 (0.97 – 1.49)        | 0.10              | 1.08 (0.87 – 1.35)        | 0.47              | 1.14 (0.92 – 1.44)                   | 0.23           |
| Race ( <i>Ref: non-Hispanic White</i> )                                                                                                                                                |                           |                   |                           |                   |                                      |                |
| Hispanic                                                                                                                                                                               | 1.34 (0.99 – 1.83)        | 0.06              | 1.26 (0.92 – 1.71)        | 0.15              | 1.11 (0.81 – 1.52)                   | 0.52           |
| Other                                                                                                                                                                                  | 0.78 (0.52 – 1.17)        | 0.23              | 0.88 (0.59 – 1.33)        | 0.55              | 0.95 (0.63 – 1.43)                   | 0.79           |
| Private Insurance ( <i>Ref: Medicaid</i> )                                                                                                                                             | <b>1.52 (1.12 – 2.05)</b> | <b>0.007</b>      | <b>1.46 (1.07 – 1.97)</b> | <b>0.02</b>       | 1.20 (0.88 – 1.63)                   | 0.25           |
| <b>Year of surgery cohort (<i>Ref: 1986-1990</i>)</b>                                                                                                                                  |                           |                   |                           |                   |                                      |                |
| 1991 – 1995                                                                                                                                                                            | 0.86 (0.57 – 1.32)        | 0.49              | 0.69 (0.46 – 1.05)        | 0.08              | 1.16 (0.76 – 1.77)                   | 0.50           |
| 1996 – 2000                                                                                                                                                                            | 1.17 (0.74 – 1.84)        | 0.47              | 1.13 (0.72 – 1.77)        | 0.60              | 1.21 (0.75 – 1.94)                   | 0.44           |
| 2001 – 2005                                                                                                                                                                            | 0.80 (0.53 – 1.19)        | 0.29              | 0.71 (0.48 – 1.05)        | 0.09              | 1.03 (0.70 – 1.57)                   | 0.88           |
| 2006 – 2010                                                                                                                                                                            | <b>0.66 (0.44 – 1.00)</b> | <b>0.05</b>       | <b>0.55 (0.37 – 0.83)</b> | <b>0.004</b>      | 1.03 (0.67 – 1.57)                   | 0.91           |

\* Cox proportional hazard (CPH) models. ↑ HR means shorter time to event compared to reference group. Dependent variables (in separate models) = ‘time to surgery’, ‘time to referral’ or ‘time from referral to surgery’. Independent variables for all models include clinical, diagnostic and demographic variables as described above, all adjusted for year of cohort. Bold indicates statistical significance of  $p \leq 0.05$ .

Abbreviations: HR = hazard ratio; Ref = reference group; AEDs = anti-epileptic drugs; MRI = Magnetic resonance imaging; LA = Los Angeles; ND = neurodevelopmental

Missing data for seizure frequency (n=6); operation type (n=7); etiology (n=26); # AEDs (n=18); Race/ethnicity (n=2), Insurance type (n=10)
