# Supplementary material
Source: PubMed Central journal article supplement (PMC3691779)
Supplement: supp_WNL.0b013e3182897082_Time_to_pediatric_epilepsy_surgery.pdf [file supp_WNL.0b013e3182897082_Time_to_pediatric_epilepsy_surgery.pdf]

## Time to pediatric epilepsy surgery is related to disease severity and nonclinical factors

### وقت جراحة الصرع لدى الأطفال مرتبط بشدة المرض و العوامل غير السريرية

**الهدف :** لتحديد العوامل السريرية و غير السريرية المرتبطة بالوقت من بداية الصرع إلى التقييم والعلاج الجراحي بين لفيف من الأطفال اللذين أجريت لهم جراحة الصرع.

**طريقة البحث :** تم إستخراج البيانات من سجلات 430 طفلا ( تقل أعمارهم عن 18 عاما) الذين خضعوا لجراحة الصرع في جامعة كاليفورنيا، لوس أنجلوس من 1986 إلى 2010. واستخدمت نماذج متعدد المتغيرات كوكس نسبي الأخطار لتحليل الارتباطات الفريدة لشدة الحالة السريرية، التصوير بالرنين المغناطيسي ما قبل الإحالة، والخصائص الاجتماعية والديموغرافية مع توقيت العملية الجراحية.

**النتائج:** ارتبط الوقت الاقصر حتى العملية الجراحية بالنتشجات الطفولية النشيطة (نسبة الخطر [HR] 5.67، فاصل الثقة 95% [CI] 3،74-8،70) و المعالجة بنجاح (2.20 HR، 95% CI 1،63-2،96)؛ بنوبات الصرع اليومية أو أكثر (2.09 HR، 95% CI 1،58-2،76)؛ بالتصوير بالرنين المغناطيسي ما قبل الإحالة بغض النظر عن نتائج التصوير (1.95 HR، 95% CI 1،47-2،58)؛ بالتأمين الصحي الخاص (1.54 HR، 95% CI 1،14-2،09)، و بالا صول اللاتينية (1.38 HR، 95% CI 1،01-1،87). كانت هناك العرق / الإثنية بواسطة تفاعلات التأمين (دخول-p = 0.049) مع أقصر وقت للعملية الجراحية للأطفال ذوي الاصول اللاتينية و التأمين الصحي الخاص.

**الاستنتاجات:** ارتبط الوقت الاقصر حتى العملية الجراحية بأكبر شدة الصرع ونوع التأمين، بما يتفق مع الأدبيات الموجودة. ومع ذلك، كانت ارتباطات الوقت الاقصر حتى العملية الجراحية مع وجود تصوير بالرنين المغناطيسي ما قبل الإحالة والعرق اللاتيني غير متوقعة، و تستحق المزيد من التحقيق. قد يفسر وجود الاطباء ذوي الدراية العلمية العالية مع الوالدين ذوي القدرة العالية على طلب المساعدة الحصول على تصوير الرنين المغناطيسي قبل الإحالة. قد يرتبط الوقت الاقصر حتى العملية الجراحية بين الأطفال ذوي الاصول اللاتينية بنفس العوامل المثمرة في زيادة عدد الأطفال من أصول لاتينية و الذين تلقوا الجراحة في جامعة كاليفورنيا، لوس أنجلوس منذ عام 2000 .

**Objective:** To identify clinical and nonclinical factors associated with time from epilepsy onset to surgical evaluation and treatment among a cohort of children having epilepsy surgery.

**Methods:** Data were abstracted from records of 430 children (younger than 18 years) who had epilepsy neurosurgery at the University of California, Los Angeles from 1986 to 2010. Multivariable Cox proportional hazards models were used to analyze unique associations of clinical severity, pre-referral brain MRI, and sociodemographic characteristics with time to surgery.

**Results:** Shorter time to surgery was associated with active (hazard ratio [HR] 5.67, 95% confidence interval [CI] 3.74–8.70) and successfully treated infantile spasms (HR 2.20, 95% CI 1.63–2.96); daily or more seizures (HR 2.09, 95% CI 1.58–2.76); MRI before referral regardless of imaging findings (HR 1.95, 95% CI 1.47–2.58); private insurance (HR 1.54, 95% CI 1.14–2.09); and Hispanic ethnicity (HR 1.38, 95% CI 1.01–1.87). There were race/ethnicity by insurance interactions (log-rank  $p = 0.049$ ) with shortest time to surgery for Hispanic children with private insurance.

**Conclusions:** Shorter intervals to surgical treatment were associated with greater epilepsy severity and insurance type, consistent with existing literature. However, associations of shorter times to treatment with having a brain MRI before referral and Hispanic ethnicity were unexpected and warrant further investigation. More knowledgeable referring providers and parents with greater help-seeking capability may explain obtaining an MRI before referral. Shorter intervals to surgery among Hispanic children may relate to the same factors yielding an increased volume of Hispanic children receiving surgery at the University of California, Los Angeles since 2000.

---

**Translator:** Latifa Boukarrou MD, Department of Neurology, Louisiana State University, Shreveport, LA  
**Translation Reviewer:** Mohamed Kazamel MD, Department of Neurology, University of Alabama at Birmingham, Birmingham, AL
